# Supplementary material for: Interactive Effects of Nitrogen and Potassium on Grain Yield and Quality of Waxy Maize
Source: MDPI journal article supplement (doi:10.3390/plants11192528), 2022-09-27
Supplement: s1 [file s1]

**Table S1.** ANOVA for interactive effects of nitrogen and potassium on grain yield and yield components of waxy maize.

| ANOVA             |            | Kernels per ear | 1000-kernel weight (g) | Grain yield (kg ha <sup>-1</sup> ) |
|-------------------|------------|-----------------|------------------------|------------------------------------|
| Year (Y)          | 2020       | 436.1b          | 294.3a                 | 8949.4b                            |
|                   | 2021       | 507.9a          | 273.7b                 | 9686.5a                            |
| Variety (V)       | SYN5       | 478.6a          | 270.3b                 | 8994.8b                            |
|                   | SYN11      | 465.4b          | 297.7a                 | 9641.1a                            |
|                   | N180K0     | 447.6e          | 271.4f                 | 8442.8g                            |
|                   | N180K75    | 474.3d          | 278.7e                 | 9167.1e                            |
|                   | N180K150   | 484.9ab         | 279.3de                | 9409.0d                            |
| Fertilization (F) | N180K75+75 | 488.9a          | 281.7d                 | 9569.9c                            |
|                   | N225K0     | 441.7f          | 281.8d                 | 8656.3f                            |
|                   | N225K75    | 482.9bc         | 285.1c                 | 9579.2c                            |
|                   | N225K150   | 478.2cd         | 294.0b                 | 9756.2b                            |
|                   | N225K75+75 | 477.4d          | 300.0a                 | 9963.0a                            |
| <i>F-value</i>    |            |                 |                        |                                    |
| Y                 |            | 3180.2**        | 910.4**                | 979.2**                            |
| V                 |            | 108.4**         | 1624.7**               | 752.8**                            |
| F                 |            | 94.9**          | 88.4**                 | 254.1**                            |
| Y × V             |            | 0.2             | 5.4*                   | 23.7**                             |
| Y × F             |            | 14.6**          | 7.2**                  | 23.7**                             |
| V × F             |            | 33.6**          | 32.5**                 | 3.0**                              |
| Y × V × F         |            | 14.9**          | 22.5**                 | 3.3**                              |

N180, N225: application 180 and 225 kg N ha<sup>-1</sup>; K0, K75, K150: application 0, 75, 150 kg K<sub>2</sub>O ha<sup>-1</sup> at sowing date; K75+75: application 75 kg K<sub>2</sub>O ha<sup>-1</sup> at sowing date and jointing stage (V6), respectively. Values followed by a different small letter within a column were significantly different at the 0.05 probability level. \* and \*\* represent significant at the 0.05 and 0.01 probability levels.

**Table S2.** ANOVA for interactive effects of nitrogen and potassium on grain components of waxy maize.

| ANOVA             |            | Starch<br>(mg g <sup>-1</sup> ) | Soluble sugar<br>(mg g <sup>-1</sup> ) | Protein<br>(mg g <sup>-1</sup> ) |
|-------------------|------------|---------------------------------|----------------------------------------|----------------------------------|
| Year (Y)          | 2020       | 640.4b                          | 35.7a                                  | 93.4a                            |
|                   | 2021       | 652.6a                          | 35.2b                                  | 90.0b                            |
| Variety (V)       | SYN5       | 664.8a                          | 35.8a                                  | 90.7b                            |
|                   | SYN11      | 628.1b                          | 35.2b                                  | 92.7a                            |
|                   | N180K0     | 603.5g                          | 35.3c                                  | 91.1bc                           |
|                   | N180K75    | 671.6b                          | 33.9e                                  | 93.8a                            |
|                   | N180K150   | 615.3f                          | 35.8b                                  | 91.9b                            |
| Fertilization (F) | N180K75+75 | 650.7d                          | 35.4c                                  | 89.3d                            |
|                   | N225K0     | 662.6c                          | 37.6a                                  | 90.0cd                           |
|                   | N225K75    | 636.2e                          | 35.3c                                  | 92.3b                            |
|                   | N225K150   | 637.3e                          | 34.6d                                  | 94.7a                            |
|                   | N225K75+75 | 694.7a                          | 35.9b                                  | 90.4cd                           |
| <i>F-value</i>    |            |                                 |                                        |                                  |
|                   | Y          | 1697.5**                        | 31.4**                                 | 42.7**                           |
|                   | V          | 188.7**                         | 25.0**                                 | 126.6**                          |
|                   | F          | 561.1**                         | 45.5**                                 | 19.5**                           |
|                   | Y × V      | 8.1**                           | 365.2**                                | 88.2**                           |
|                   | Y × F      | 106.1**                         | 115.6**                                | 17.1**                           |
|                   | V × F      | 66.1**                          | 148.9**                                | 24.9**                           |
|                   | Y × V × F  | 38.7**                          | 80.1**                                 | 29.1**                           |

N180, N225: application 180 and 225 kg N ha<sup>-1</sup>; K0, K75, K150: application 0, 75, 150 kg K<sub>2</sub>O ha<sup>-1</sup> at sowing date; K75+75: application 75 kg K<sub>2</sub>O ha<sup>-1</sup> at sowing date and jointing stage (V6), respectively. Values followed by a different small letter within a column were significantly different at the 0.05 probability level. \* and \*\* represent significant at the 0.05 and 0.01 probability levels.

**Table S3.** ANOVA for interactive effects of nitrogen and potassium on starch volume distributions of waxy maize.

| ANOVA             |                         | Volume percentage (%) |                    |                   | Mean particle size<br>( $\mu\text{m}$ ) |
|-------------------|-------------------------|-----------------------|--------------------|-------------------|-----------------------------------------|
|                   |                         | <5 $\mu\text{m}$      | 5-15 $\mu\text{m}$ | >15 $\mu\text{m}$ |                                         |
| Year (Y)          | 2020                    | 8.03a                 | 34.41a             | 57.56b            | 15.78b                                  |
|                   | 2021                    | 7.99b                 | 30.90b             | 61.12a            | 16.11a                                  |
| Variety (V)       | SYN5                    | 8.07a                 | 35.14a             | 56.80b            | 15.63b                                  |
|                   | SYN11                   | 7.95b                 | 30.17b             | 61.88a            | 16.26a                                  |
|                   | N180K0                  | 8.03bc                | 35.51a             | 56.46f            | 15.57e                                  |
|                   | N180K75                 | 7.94e                 | 31.18e             | 60.88b            | 16.22a                                  |
|                   | N180K150                | 7.96d                 | 30.72f             | 61.32a            | 16.20a                                  |
| Fertilization (F) | N180K75+75              | 8.02b                 | 32.96c             | 59.02d            | 15.83c                                  |
|                   | N225K0                  | 8.10a                 | 34.50b             | 57.40e            | 15.69d                                  |
|                   | N225K75                 | 8.02c                 | 32.03d             | 59.96c            | 15.99b                                  |
|                   | N225K150                | 8.04b                 | 33.01c             | 58.94d            | 15.88c                                  |
|                   | N225K75+75              | 7.95de                | 31.29e             | 60.75b            | 16.18a                                  |
| <i>F-value</i>    |                         |                       |                    |                   |                                         |
|                   | Y                       | 168.2**               | 1199.4**           | 1201.5**          | 524.8**                                 |
|                   | V                       | 1267.5**              | 2405.2**           | 2462.0**          | 1883**                                  |
|                   | F                       | 148.0**               | 138.8**            | 142.9**           | 139.7**                                 |
|                   | Y $\times$ V            | 88.5**                | 336.3**            | 339.8**           | 307.2**                                 |
|                   | Y $\times$ F            | 108.0**               | 18.3**             | 18.9**            | 19.6**                                  |
|                   | V $\times$ F            | 164.8**               | 70.8**             | 75.6**            | 69.7**                                  |
|                   | Y $\times$ V $\times$ F | 61.2**                | 62.3**             | 64.1**            | 59.2**                                  |

N180, N225: application 180 and 225 kg N ha<sup>-1</sup>; K0, K75, K150: application 0, 75, 150 kg K<sub>2</sub>O ha<sup>-1</sup> at sowing date; K75+75: application 75 kg K<sub>2</sub>O ha<sup>-1</sup> at sowing date and jointing stage (V6), respectively. Values followed by a different small letter within a column were significantly different at the 0.05 probability level. \* and \*\* represent significant at the 0.05 and 0.01 probability levels.

**Table S4.** ANOVA for interactive effects of nitrogen and potassium on pasting properties of waxy maize.

| ANOVA             |            | PV<br>(cP) | TV<br>(cP) | BD<br>(cP) | FV<br>(cP) | SB<br>(cP) | $P_{temp}$<br>(°C) |
|-------------------|------------|------------|------------|------------|------------|------------|--------------------|
| Year (Y)          | 2020       | 1886.8b    | 1296.4b    | 590.4b     | 1620.4b    | 324.0a     | 78.7a              |
|                   | 2021       | 2241.7a    | 1352.1a    | 889.6a     | 1641.6a    | 289.5b     | 77.8b              |
| Variety (V)       | SYN5       | 2056.7a    | 1334.5a    | 722.2b     | 1651.2a    | 316.7a     | 78.9a              |
|                   | SYN11      | 2071.8a    | 1314.0b    | 757.8a     | 1610.8b    | 296.9b     | 77.7b              |
|                   | N180K0     | 2081.6c    | 1344.0ab   | 737.6c     | 1651.2ab   | 307.2ab    | 78.4a              |
|                   | N180K75    | 2012.4de   | 1318.8cd   | 693.7d     | 1620.6c    | 301.8bc    | 78.5a              |
| Fertilization (F) | N180K150   | 1967.5e    | 1293.0e    | 674.5d     | 1598.8c    | 305.8ab    | 78.3a              |
|                   | N180K75+75 | 2038.2cd   | 1305.1de   | 733.1c     | 1617.4c    | 312.3ab    | 78.1a              |
|                   | N225K0     | 2198.7a    | 1360.7a    | 838.0a     | 1672.8a    | 312.1ab    | 78.0a              |
|                   | N225K75    | 2077.2c    | 1332.3bc   | 744.9c     | 1625.7bc   | 293.4c     | 78.6a              |
|                   | N225K150   | 1996.5de   | 1305.2de   | 691.3d     | 1609.5c    | 304.3bc    | 78.4a              |
|                   | N225K75+75 | 2142.0b    | 1335.1bc   | 806.9b     | 1652.2ab   | 317.1a     | 78.0a              |
| <i>F-value</i>    |            |            |            |            |            |            |                    |
|                   | Y          | 1019.4**   | 95.0**     | 1976.9**   | 9.6**      | 153.0**    | 51.0**             |
|                   | V          | 1.8        | 13.0**     | 28.0**     | 35.1**     | 50.4**     | 84.0**             |
|                   | F          | 24.2**     | 8.0**      | 36.2**     | 6.8**      | 3.4**      | 1.3                |
|                   | Y × V      | 10.3**     | 8.3**      | 8.2**      | 15.9**     | 14.7**     | 0.4                |
|                   | Y × F      | 14.2**     | 9.5**      | 16.0**     | 9.1**      | 4.3**      | 2.4*               |
|                   | V × F      | 38.6**     | 26.0**     | 38.4**     | 31.0**     | 14.4**     | 1.9                |
|                   | Y × V × F  | 18.0**     | 14.8**     | 19.5**     | 14.3**     | 3.3**      | 2.7*               |

N180, N225: application 180 and 225 kg N ha<sup>-1</sup>; K0, K75, K150: application 0, 75, 150 kg K<sub>2</sub>O ha<sup>-1</sup> at sowing date; K75+75: application 75 kg K<sub>2</sub>O ha<sup>-1</sup> at sowing date and jointing stage (V6), respectively. PV: peak viscosity; TV: trough viscosity; BD: breakdown viscosity; FV: final viscosity; SB: setback viscosity;  $P_{temp}$ : pasting temperature; cP: centipoise. Values followed by a different small letter within a column are significantly different at the 0.05 probability level. \* and \*\* represent significant at the 0.05 and 0.01 probability levels.
